# Supplementary material for: Structural and Photoprotective Characteristics of Zn-Ti, Zn-Al, and Mg-Al Layered Double Hydroxides—A Comparative Study
Source: MDPI journal article supplement (doi:10.3390/cosmetics10040100), 2023-07-07
Supplement: s1 [file s1]

# Structural and Photoprotective Characteristics of Zn-Ti, Zn-Al, and Mg-Al Layered Double Hydroxides – A Comparative Study

Orielia Pria Egambaram <sup>1,2,3</sup>, Sreejarani Kesavan Pillai <sup>1,\*</sup>, Suprakas Sinha Ray <sup>1,2</sup> and Marlize Goosen <sup>4</sup>

<sup>1</sup> DST/CSIR Centre for Nanostructures and Advanced Materials, Council for Scientific and Industrial Research, Pretoria 0001, South Africa; o.egambaram@kent.ac.uk (O.P.E.); rsuprakas@csir.co.za (S.S.R.)

<sup>2</sup> Department of Chemical Sciences, University of Johannesburg, Johannesburg 2028, South Africa

<sup>3</sup> Division of Natural Sciences, University of Kent, Canterbury CT2 7NH, UK

<sup>4</sup> Photobiology Laboratory, Sefako Makgatho University, Pretoria 0204, South Africa; marlize.lategan@smu.ac.za

\* Correspondence: skpillai@csir.co.za; Tel.: +27-12-8413759

## Supplementary information

**Table S1:** Relative amounts of contents for oil/water formulations.

|            |                   | 2 wt% Formulation |
|------------|-------------------|-------------------|
|            |                   | Amount (g)        |
| Aqua Phase | Water             | 54.8              |
|            | Rheology Modifier | 25                |
|            | Carbomer          | 0.2               |
|            | NaOH              | 0.5               |
| Oil Phase  | Oil               | 10                |
|            | LDH*              | 2                 |
|            | Alracel           | 3                 |
|            | C/S Alcohol       | 4                 |
|            | Preservative      | 0.5               |

LDH\* - in the case of the 2 wt% Zn-Al formulation, 2g of Zn-Al LDH was used instead of Zn-Ti LDH

Both the oil phase and aqueous phase containing Zn-Ti LDH (2 wt%) were heated to 70 °C. After both phases reached the desired temperature, the oil phase was combined into the water phase and mixed for

5 minutes with a high shear silverson homogenizer. The neutralizer was then added, and the whole mixture was then mixed for another 5 minutes with the same homogenizer at 3000 rpm. The mixture was cooled to 40 °C and a preservative was added to obtain the LDH based emulsion. The pH of the final formulation was adjusted to 5.6.

## XRD

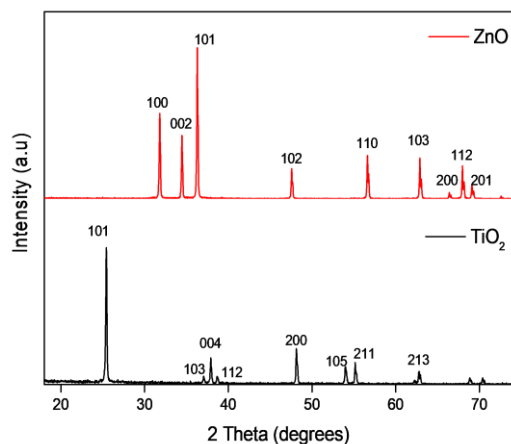

**Figure S1.** XRD spectra of TiO<sub>2</sub> and ZnO.

## SEM

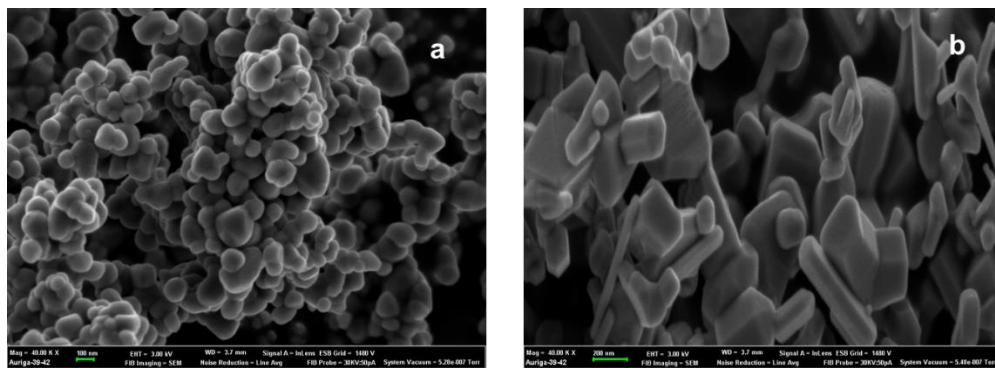

**Figure S2.** SEM images of a) TiO<sub>2</sub> and b) ZnO.

## BET

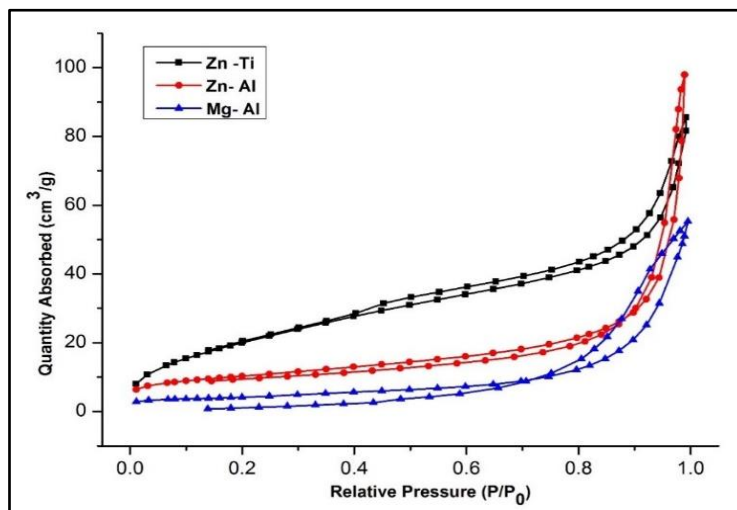

**Figure S3.** N<sub>2</sub> - adsorption isotherms for LDHs synthesized with different metal cations.

The shapes of the Zn-Al and Mg-Al adsorption isotherms (Figure S3) were similar, with minimal amounts of nitrogen adsorbed at lower relative pressures, and a higher amount only being adsorbed at higher relative pressures. Zn-Al and Mg-Al LDH displayed a typical isotherm Type IV, which is indicative of mesoporous materials. A characteristic feature of Type IV isotherm is its H<sub>1</sub> hysteresis loop which is fairly narrow, and the adsorption and desorption branches are nearly parallel and are usually explained by the presence of agglomerates. The substitution of Ti<sup>4+</sup> within the layers changed the isotherm of Type II for Zn-Ti LDH with an H<sub>3</sub> hysteresis loop usually associated with the presence of plate-like particles with very narrow slit-shaped pores. The Zn-Ti LDH isotherm, in comparison, shows a higher quantity of adsorbed nitrogen at lower relative pressure, accompanied by a steeper increase at higher relative pressures associated with a higher degree of interparticle porosity.

## K-M Graphs

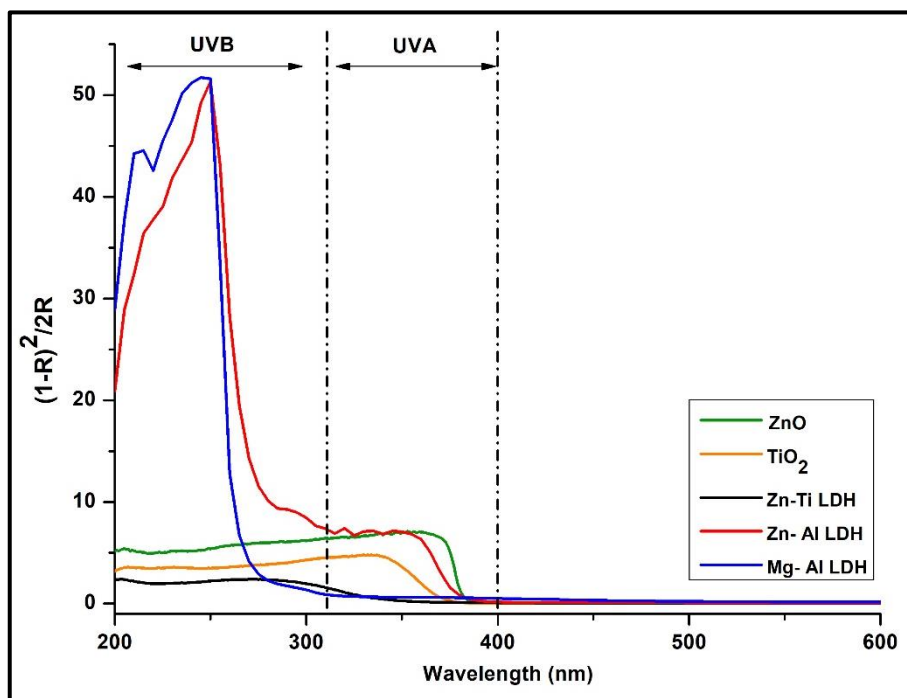

**Figure S4.** Kubelka-Munk plot of different LDH and references (ZnO and TiO<sub>2</sub>).

## Band Gap

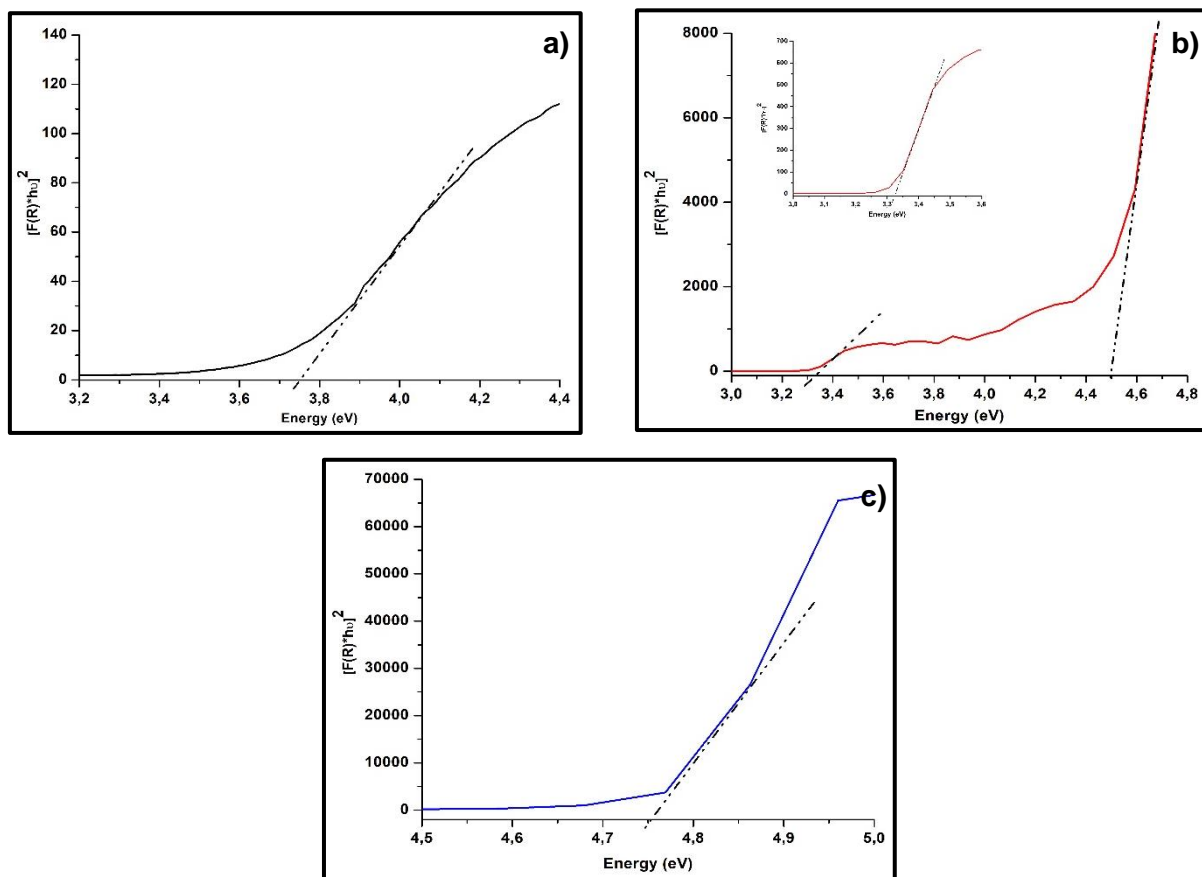

**Figure S5.** Tauc plots indicating the band Gap of a) Zn-Ti LDH, b) Zn-Al LDH and c) Mg-Al LDH.
